# Supplementary material
Source: PubMed Central journal article supplement (PMC1691211)
Supplement: 12590772s01.pdf [file 12590772s01.pdf]

These are electronic appendices to the paper by Hausmann *et al.* 2003 *Proc. R. Soc. Lond. B* (ISSN 0962 8452): No. 1510, pp. 61—67.

Electronic appendices are refereed with the text. However, no attempt has been made to impose a uniform editorial style on the electronic appendices.

APPENDIX A. Test for an association between UV Colours and courtship displays

| family      | common name<br>(§ species used in genus-level analysis) | scientific name                       | UV Colours in<br>displayed regions?<br>(+ yes, - no) | UV Colours in<br>non-displayed regions?<br>(+ yes, - no) |
|-------------|---------------------------------------------------------|---------------------------------------|------------------------------------------------------|----------------------------------------------------------|
| kingfishers |                                                         |                                       |                                                      |                                                          |
|             | azure kingfisher                                        | ( <i>Alcedo azurea</i> )              | +                                                    | +                                                        |
|             | forest kingfisher                                       | ( <i>Halcyon macleayii</i> )          | +                                                    | +                                                        |
|             | sacred kingfisher §                                     | ( <i>Halcyon sancta</i> )             | +                                                    | -                                                        |
| parrots     |                                                         |                                       |                                                      |                                                          |
|             | budgerigar                                              | ( <i>Melopsittacus undulatus</i> )    | +                                                    | -                                                        |
|             | king parrot                                             | ( <i>Alistreus scaoularis</i> )       | -                                                    | +                                                        |
|             | red-capped parrot                                       | ( <i>Purpureicephalus spurius</i> )   | +                                                    | +                                                        |
|             | blue bonnet                                             | ( <i>Northeriella haematogaster</i> ) | +                                                    | -                                                        |
|             | red-winged parrot                                       | ( <i>Aprosmictus erythropterus</i> )  | +                                                    | +                                                        |
|             | turquoise parrot                                        | ( <i>Neophema pulchella</i> )         | +                                                    | -                                                        |
|             | scarlet-chested parrot                                  | ( <i>Neophema splendida</i> )         | +                                                    | -                                                        |
|             | Bourke's parrot                                         | ( <i>Neophema bourkii</i> )           | +                                                    | +                                                        |
|             | blue-winged parrot                                      | ( <i>Neophema chrysostoma</i> )       | +                                                    | -                                                        |
|             | rock parrot                                             | ( <i>Neophema petrophilla</i> )       | +                                                    | +                                                        |
|             | ring-necked parrot                                      | ( <i>Platycercus zanarius</i> )       | +                                                    | -                                                        |
|             | crimson rosella                                         | ( <i>Platycercus elegans</i> )        | +                                                    | -                                                        |
|             | eastern rosella §                                       | ( <i>Platycercus eximicus</i> )       | +                                                    | -                                                        |
|             | Alexandra's parrot                                      | ( <i>Polytelis alexandrae</i> )       | +                                                    | +                                                        |
|             | regent parrot                                           | ( <i>Polytelis anthopeplus</i> )      | +                                                    | +                                                        |
|             | superb parrot                                           | ( <i>Polytelis swainsonii</i> )       | +                                                    | +                                                        |

|                            |                                         |   |   |
|----------------------------|-----------------------------------------|---|---|
| rainbow lorikeet           | ( <i>Trichoglossus haematodus</i> )     | + | + |
| pigeons                    |                                         |   |   |
| crested pigeon §           | ( <i>Ocyphaps lopholes</i> )            | + | + |
| rose-crowned fruit-dove    | ( <i>Ptilinopus regina</i> )            | - | + |
| pittas                     |                                         |   |   |
| noisy pitta §              | ( <i>Pitta versicolour</i> )            | + | - |
| bowerbirds                 |                                         |   |   |
| green catbird §            | ( <i>Ailuroedus crassirostris</i> )     | + | + |
| spotted bowerbird          | ( <i>Chlamydera maculata</i> )          | + | - |
| fairy-wrens                |                                         |   |   |
| variegated fairy-wren      | ( <i>Malurus assimilis</i> )            | + | - |
| splendid fairy-wren §      | ( <i>Malurus splendens</i> )            | + | - |
| southern emu-wren          | ( <i>Stripityurus ruficeps</i> )        | + | - |
| honeyeaters                |                                         |   |   |
| brown honeyeater §         | ( <i>Lichimera indistincta</i> )        | + | - |
| rufous-throated honeyeater | ( <i>Conopophila rufularis</i> )        | + | - |
| robins                     |                                         |   |   |
| rose robin                 | ( <i>Petroica rosae</i> )               | + | - |
| eastern yellow robin §     | ( <i>Eopsaltria australis</i> )         | + | - |
| corvids                    |                                         |   |   |
| golden whistler §          | ( <i>Pachycephala pectoralis</i> )      | + | - |
| yellow-breasted boatbill   | ( <i>Machaerirhynchus flaviventer</i> ) | - | + |
| shining flycatcher         | ( <i>Myiagra alecto</i> )               | + | - |
| magnificent riflebird      | ( <i>Ptiloris magnificus</i> )          | + | - |
| Victoria riflebird         | ( <i>Ptiloris victoriae</i> )           | + | - |
| paradise riflebird         | ( <i>Ptiloris paradiseus</i> )          | + | - |
| trumpet manucode           | ( <i>Manucodia keraudrenii</i> )        | + | - |
| sunbirds                   |                                         |   |   |
| yellow-breasted sunbird §  | ( <i>Nectarinia jugularia</i> )         | + | - |
| estrilid finches           |                                         |   |   |
| gouldian finch §           | ( <i>Erythrura gouldiae</i> )           | + | - |

---

APPENDIX B Test for an association between Fluorescent plumage and courtship displays in parrots

| genus            | common name<br>(§ species used in family-level analysis) | scientific name                      | Fluorescence in<br>displayed regions?<br>(+ yes, - no) | Fluorescence in<br>non-displayed regions ?<br>(+ yes, - no) |
|------------------|----------------------------------------------------------|--------------------------------------|--------------------------------------------------------|-------------------------------------------------------------|
| Calyptorhynchus  | red tailed black cockatoo                                | ( <i>Calyptorhynchus banksii</i> )   | +                                                      | +                                                           |
|                  | glossy black cockatoo §                                  | ( <i>Calyptorhynchus lathami</i> )   | +                                                      | -                                                           |
|                  | yellow tailed black cockatoo                             | ( <i>Calyptorhynchus funereus</i> )  | +                                                      | +                                                           |
| Callocephalon    | gang gang cockatoo §                                     | ( <i>Callocephalon fimbriatum</i> )  | +                                                      | +                                                           |
| Cacatua          | little corella §                                         | ( <i>Cacatua sanguinea</i> )         | +                                                      | -                                                           |
|                  | long billed corella                                      | ( <i>Cacatua tenuirostris</i> )      | +                                                      | -                                                           |
|                  | western corella                                          | ( <i>Cacatua pastinator</i> )        | +                                                      | +                                                           |
|                  | major mitchell's cockatoo                                | ( <i>Cacatua leadbeateri</i> )       | +                                                      | -                                                           |
|                  | sulphur crested cockatoo                                 | ( <i>Cacatua galerita</i> )          | +                                                      | -                                                           |
| Nymphicus        | cockateil §                                              | ( <i>Nymphicus hollandicus</i> )     | +                                                      | +                                                           |
| Alisterus        | australian king parrot §                                 | ( <i>Alisterus scapularis</i> )      | +                                                      | -                                                           |
| Aprosmictus      | red winged parrot §                                      | ( <i>Aprosmictus erythropterus</i> ) | -                                                      | +                                                           |
| Polytelis        | regent parrot §                                          | ( <i>Polytelis anthopeplus</i> )     | +                                                      | -                                                           |
|                  | superb parrot                                            | ( <i>Polytelis swainsonii</i> )      | +                                                      | -                                                           |
|                  | princess parrot                                          | ( <i>Polytelis alexandrae</i> )      | +                                                      | -                                                           |
| Melopsittacus    | budgerigar §                                             | ( <i>Melopsittacus undulatus</i> )   | +                                                      | +                                                           |
| Purpureicephalus | red capped parrot §                                      | ( <i>Purpureicephalus spurius</i> )  | +                                                      | +                                                           |
| Platycercus      |                                                          |                                      |                                                        |                                                             |

|                           |  |  |  |  |  |   |
|---------------------------|--|--|--|--|--|---|
| green rosella             |  |  |  |  |  | + |
| crimson rosella           |  |  |  |  |  | - |
| eastern rosella           |  |  |  |  |  | + |
| pale headed rosella       |  |  |  |  |  | + |
| northern rosella §        |  |  |  |  |  | + |
| western rosella           |  |  |  |  |  | + |
| Barnardius                |  |  |  |  |  |   |
| australian ring neck §    |  |  |  |  |  | - |
| Psephotus                 |  |  |  |  |  |   |
| red rumped parrot         |  |  |  |  |  | - |
| mulga parrot §            |  |  |  |  |  | - |
| golden shouldered parrots |  |  |  |  |  | - |
| hooded parrot             |  |  |  |  |  | - |
| Northiella                |  |  |  |  |  |   |
| blue bonnet §             |  |  |  |  |  | - |
| Neophema                  |  |  |  |  |  |   |
| blue winged parrot        |  |  |  |  |  | + |
| elegant parrot            |  |  |  |  |  | + |
| turquoise parrot §        |  |  |  |  |  | - |
| scarlet chested parrot    |  |  |  |  |  | - |

*(Platycercus caledonicus)* +  
*(Platycercus elegans)* +  
*(Platycercus eximius)* +  
*(Platycercus adscitus)* +  
*(Platycercus venustus)* +  
*(Platycercus icterotis)* +  
*(Barnardius zonarius)* +  
*(Psephotus haemototus)* +  
*(Psephotus varius)* +  
*(Psephotus chrysopterygius)* +  
*(Psephotus dissimilis)* +  
*(Northiella haematogaster)* +  
*(Neophema chrysostema)* +  
*(Neophema elegans)* +  
*(Neophema pulchella)* +  
*(Neophema splendida)* +

+

-

+

+

+

+

-

-

-

-

-

+

+

-

-
